# Supplementary material for: Induction of one-handed helical oligo(p-benzamide)s by domino effect based on planar-axial-helical chirality relay
Source: Royal Society of Chemistry journal article supplement (doi:10.1039/b818123c), 2009-01-01

## Supporting Information

### Induction of One-handed Helical Oligo (*p*-Benzamide)s by Domino Effect Based on the Planar-Axial-Helical Chirality Relay

Ken Kamikawa<sup>†\*</sup>, Kohei Yoshihara<sup>†</sup>, Keisuke Fukumoto<sup>†</sup>, Masaru Furusyo, Motokazu Uemura, Shin Takemoto<sup>†</sup>, Hiroyuki Matsuzaka<sup>†</sup>

*Department of Chemistry, Graduate School of Science, Osaka Prefecture University Sakai, Osaka 599-8531, Japan. Kyoto Pharmaceutical University, Misasagi, Yamashina, Kyoto 640-8412, Japan*

*Japan*

(*S*)-Iodoferrocene (**2**)<sup>1</sup> and *p*-oligobenzamide<sup>2</sup> were prepared by reported procedure.

#### General Procedure for Ferrocenyloligoamide

To a solution of (*S*)-iodoferronocarboxylic acid (50 mg, 0.14 mmol) in CH<sub>2</sub>Cl<sub>2</sub> (1.0 mL), (COCl)<sub>2</sub> (24 μl, 0.28 mmol) was added at 25 °C under argon. The resulting solution was stirred for 0.5 h and concentrated under reduced pressure. The residue was diluted with CH<sub>2</sub>Cl<sub>2</sub> (2.0 mL). Oligo (*p*-benzamide) (0.14 mmol) and Et<sub>3</sub>N (39 ml, 0.28 mmol) were dissolved in CH<sub>2</sub>Cl<sub>2</sub> (1.0 mL) and added to the solution. The resulting mixture was stirred 15 h at 25 °C. The reaction mixture was extracted with CHCl<sub>3</sub> and organic layer was washed with NaHCO<sub>3</sub> aq. and brine. The organic layer was dried over MgSO<sub>4</sub>, filtrated and concentrated under reduced pressure. The crude product was recrystallized from diethylether to give yellow crystals of **3** (73-80% yield).

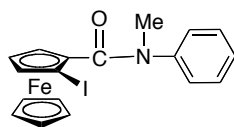

#### Ferrocenylamide **1**

mp 110°C;  $[\alpha]_D^{21} = -41.5$  (c 1.1, CHCl<sub>3</sub>); <sup>1</sup>H-NMR (400 MHz, CDCl<sub>3</sub>) δ 3.41 (3H, s), 3.73 (1H, d, *J* = 2.5 Hz), 3.96 (1H, t, *J* = 2.5 Hz), 4.25 (5H, s), 4.41-4.42 (1H, m), 7.01 (2H, d, *J* = 7.2 Hz), 7.16 (1H, d, *J* = 7.2 Hz), 7.20-7.26 (2H, m); <sup>13</sup>C-NMR (100 MHz,

$\text{CDCl}_3$ )  $\delta$  68.6, 68.9, 72.9, 75.6, 76.7, 77.0, 77.3, 126.5, 126.9, 128.9; IR ( $\text{CHCl}_3$ ) 3006, 2958, 1637, 1595, 1558  $\text{cm}^{-1}$ ; MS (relative intensity)  $m/z$  445 ( $\text{M}^+$ , 100), 318 (48), 262 (35); HRMS calcd for  $\text{C}_{18}\text{H}_{16}\text{NOIFe}$ , 444.9626. found 444.9627.

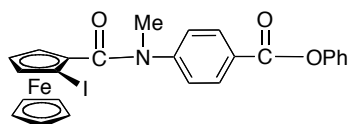

### Ferrocenylamide **3a**.

$[\alpha]_{\text{D}}^{23} = -6.0$  ( $c$  0.2,  $\text{CHCl}_3$ );  $^1\text{H-NMR}$ (400 MHz,  $\text{CDCl}_3$ )  $\delta$  3.47 (3H, s), 3.87 (1H, d,  $J = 2.5\text{Hz}$ ), 4.06 (1H, d,  $J = 2.5\text{Hz}$ ), 4.27 (5H, s), 4.48 (1H, d,  $J = 2.5\text{Hz}$ ), 7.12 (2H, d,  $J = 8.8\text{Hz}$ ), 7.18 (2H, d,  $J = 7.7\text{Hz}$ ), 7.27 (2H, d,  $J = 7.7\text{Hz}$ ), 7.42 (2H, d,  $J = 7.7\text{Hz}$ ), 8.05 (2H, d,  $J = 8.8\text{Hz}$ );  $^{13}\text{C-NMR}$  (100 MHz,  $\text{CDCl}_3$ )  $\delta$  37.7, 68.9, 69.2, 72.8, 73.0, 75.9, 77.2, 111.1, 121.5, 121.9, 125.9, 126.3, 126.9, 129.3, 129.4, 130.8, 132.2, 149.2, 150.7, 164.3, 168.5; IR ( $\text{CHCl}_3$ ) 3352, 1728, 1604, 1443, 1268, 1075, 939  $\text{cm}^{-1}$ ; MS (relative intensity)  $m/z$  565 ( $\text{M}^+$ , 100), 437 (48), 339 (53); HRMS calcd for  $\text{C}_{25}\text{H}_{21}\text{NO}_3\text{IFe}$ , 564.9838. found 564.9838

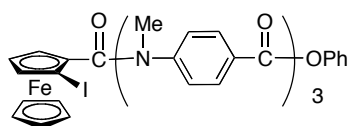

### Ferrocenylamide **3b**

mp 132°C;  $[\alpha]_{\text{D}}^{26} = +47.0$  ( $c$  0.2,  $\text{CHCl}_3$ );  $^1\text{H-NMR}$  (400 MHz,  $\text{CDCl}_3$ )  $\delta$  3.33 (3H, s), 3.41 (3H, s), 3.55 (3H, s), 3.71 (1H, d,  $J = 2.5\text{Hz}$ ), 4.03 (1H, t,  $J = 2.5\text{Hz}$ ), 4.24 (5H, s), 4.42 (1H, d,  $J = 2.5\text{Hz}$ ), 6.81 (2H, d,  $J = 8.3\text{Hz}$ ), 6.83 (2H, d,  $J = 8.5\text{Hz}$ ), 7.08 (2H, d,  $J = 8.3\text{Hz}$ ), 7.10 (2H, d,  $J = 8.5\text{Hz}$ ), 7.20 (4H, d,  $J = 8.5\text{Hz}$ ), 7.29 (1H, t,  $J = 7.8\text{Hz}$ ), 7.44 (2H, t,  $J = 7.8\text{Hz}$ ), 8.07 (2H, d,  $J = 8.5\text{Hz}$ );  $^{13}\text{C-NMR}$  (100 MHz,  $\text{CDCl}_3$ )  $\delta$  37.8, 38.1, 38.2, 68.9, 69.0, 73.0, 73.3, 75.7, 77.2, 121.5, 125.8, 125.9, 126.1, 126.4, 127.3, 129.5, 131.2, 132.9, 133.0, 146.0, 146.2, 149.3, 150.6, 164.1, 168.2, 169.3, 169.4; IR( $\text{CHCl}_3$ ) 3361, 1793, 1642, 1599, 1294, 1095  $\text{cm}^{-1}$ ; MS (relative intensity)  $m/z$  831 ( $\text{M}^+$ , 23), 705 (61), 548 (17), 497 (16), 368 (17), 213 (18), 185 (15), 134 (100); HRMS calcd for  $\text{C}_{41}\text{H}_{34}\text{N}_3\text{O}_5\text{IFe}$ , 831.0893. found. 831.0889

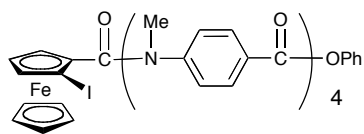

### Ferrocenylamide **3c**

mp 125°C;  $[\alpha]_D^{26} = +36.0$  (*c* 0.1, CHCl<sub>3</sub>); <sup>1</sup>H-NMR (400 MHz, CDCl<sub>3</sub>) δ 3.35 (3H, s), 3.36 (3H, s), 3.44 (3H, s), 3.55 (3H, s), 3.68 (1H, s), 4.01 (1H, t, *J* = 2.4Hz), 4.23 (5H, s), 4.40-4.41 (1H, m), 6.76 (4H, d, *J* = 8.8Hz), 6.82 (2H, d, *J* = 8.5Hz), 7.01 (2H, d, *J* = 8.5Hz), 7.08 (2H, d, *J* = 8.8Hz), 7.12 (2H, d, *J* = 8.5Hz), 7.17 (1H, d, *J* = 8.0Hz), 7.20 (2H, d, *J* = 8.5Hz), 7.29 (1H, t, *J* = 8.0Hz), 7.44 (2H, t, *J* = 8.0Hz); <sup>13</sup>C-NMR (100 MHz, CDCl<sub>3</sub>) δ; 37.8, 38.1, 38.2, 38.3, 66.1, 68.9, 69.2, 73.0, 75.8, 77.2, 121.5, 125.7, 125.9, 126.0, 126.1, 126.4, 127.3, 129.5, 129.6, 129.8, 129.9, 131.2, 132.9, 133.0, 133.5, 145.9, 146.1, 146.2, 149.3, 150.6, 164.1, 168.3, 169.2; IR(CHCl<sub>3</sub>) 3414, 1733, 1603, 1372, 1193, 1059, 909 cm<sup>-1</sup>; MS (relative intensity) *m/z* 964 (M<sup>+</sup>, 41), 899 (3), 831 (7), 544 (8), 472 (9), 339 (67), 154 (100)

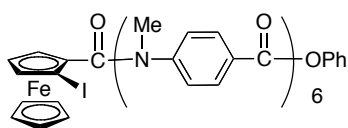

### Ferrocenylamide **3d**

mp 135°C;  $[\alpha]_D^{24} = +26.7$  (*c* 0.06, CHCl<sub>3</sub>) <sup>1</sup>H-NMR (400 MHz, CDCl<sub>3</sub>) δ 3.35 (3H, s), 3.39 (6H, s), 3.41 (3H, s), 3.42 (3H, s), 3.54 (3H, s), 3.67 (1H, s), 4.00-4.01 (1H, m), 4.23 (5H, s), 4.40 (1H, s), 6.75-6.78 (6H, m), 6.80 (2H, d, *J* = 8.3Hz), 6.85 (2H, d, *J* = 8.3Hz), 7.02 (2H, d, *J* = 8.5Hz), 7.05-7.12 (8H, m), 7.18 (2H, d, *J* = 7.8Hz), 7.20 (2H, d, *J* = 8.5Hz), 7.29 (1H, t, *J* = 7.8Hz), 7.43 (2H, t, *J* = 7.8Hz), 8.05 (2H, d, *J* = 8.3Hz); <sup>13</sup>C-NMR (100 MHz, CDCl<sub>3</sub>) δ 37.8, 38.1, 38.2, 38.3, 38.4, 42.3, 65.8, 68.9, 69.1, 73.0, 75.8, 77.2, 121.5, 125.8, 125.9, 126.0, 126.1, 126.2, 126.4, 127.4, 129.5, 129.6, 129.7, 129.8, 129.9, 130.0, 131.1, 133.0, 133.1, 133.4, 133.6, 145.8, 145.9, 146.0, 146.0, 146.1, 149.3, 150.6, 164.1, 168.2, 169.1, 169.2, 169.3, 169.4; IR(CHCl<sub>3</sub>) 3387, 1737, 1640, 1603, 1367, 1268, 1174, 909 cm<sup>-1</sup>; MS (relative intensity) *m/z* 1231 (M<sup>+</sup>, 15), 1165 (3), 1097 (4), 893 (3), 810 (5), 760 (4), 472 (13), 444 (4), 339 (60), 316 (10), 134 (100), 132 (43); HRMS calcd for C<sub>65</sub>H<sub>55</sub>N<sub>6</sub>O<sub>8</sub>IFe, 1231.2556. found. 1231.2551

### Synthesis of planar chiral 2-methyl or 2-naphtyl ferrocenecarboxylic acid

2-Naphtyl ferrocenecarboxylic acids were prepared by a conventional Suzuki-Miyaura cross-coupling reaction. 2-Naphtyl ferrocenyloligoamides were prepared by the procedure mentioned in S1.

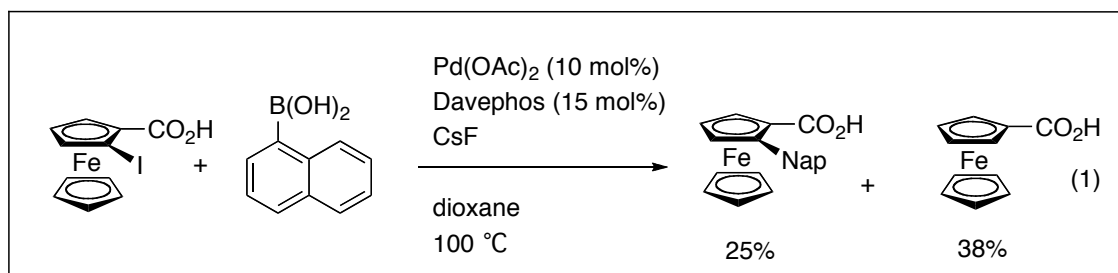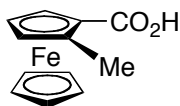

$[\alpha]_D^{27} = 11.1$  (*c* 0.13, CHCl<sub>3</sub>); <sup>1</sup>H-NMR(500 MHz, CDCl<sub>3</sub>) δ 2.30 (3H, s), 4.18 (5H, s), 4.31 (1H, t, *J* = 2.3Hz), 4.38 (1H, s), 4.79 (1H, s); <sup>13</sup>C-NMR (100 MHz, CDCl<sub>3</sub>) 14.6, 68.1, 69.5, 70.6, 70.7, 74.3, 87.5, 179.4; IR (CHCl<sub>3</sub>) 3099, 1712, 1289, 1214, 894, 767cm<sup>-1</sup>; MS (relative intensity) *m/z* 244 (M<sup>+</sup>, 100), 179 (18), 149 (6), 138 (37), 106(26) ; HRMS calcd for C<sub>12</sub>H<sub>12</sub>FeO<sub>2</sub>, 244.0187. found 244.0193

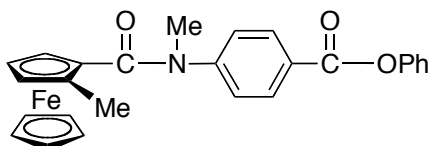

#### Ferrocenylamide **4a**

$[\alpha]_D^{25} = 142.0$  (*c* 0.28, CHCl<sub>3</sub>); <sup>1</sup>H-NMR (500 MHz, CDCl<sub>3</sub>) δ 2.07 (3H, s), 3.46 (3H, s), 3.81 (1H, s), 3.97 (1H, s), 4.21 (5H, s), 4.21 (1H, s), 7.14 (2H, d, *J* = 7.8Hz), 7.19 (2H, d, *J* = 7.8Hz), 7.27(1H, t, *J* = 7.8Hz), 7.42 (2H, t, *J* = 7.8Hz), 8.07 (2H, d, *J* = 7.8Hz) ; <sup>13</sup>C-NMR (100 MHz, CDCl<sub>3</sub>) 14.0, 37.7, 66.9, 69.4, 70.7, 70.9, 78.9, 86.8, 121.6, 126.0, 126.1, 126.5, 129.5, 130.8, 150.0, 150.8, 164.4, 171.2 ; IR (CHCl<sub>3</sub>) 3055, 1732, 1600, 1270, 1186, 760.7cm<sup>-1</sup>; MS (relative intensity) *m/z* 453 (M<sup>+</sup>, 100), 451 (7), 332(8), 227(90), 199(38), 180(11), 149(13), 132(10) ; HRMS calcd for C<sub>26</sub>H<sub>23</sub>FeNO<sub>3</sub>, 453.1027. found 457.1031

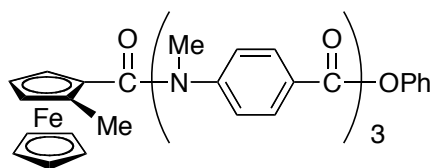

#### Ferrocenylamide **4b**

$[\alpha]_D^{26} = 93.8$  (*c* 0.16, CHCl<sub>3</sub>); <sup>1</sup>H-NMR(500 MHz, CDCl<sub>3</sub>)  $\delta$  2.02(3H, s), 3.32(3H, s), 3.42(3H, s), 3.55(3H, s), 3.55(1H, s), 3.86(1H, t, *J* = 2.3Hz), 4.07(1H, s), 4.11(5H, s), 6.81(2H, d, *J* = 8.2Hz), 6.85(2H, d, *J* = 8.2Hz), 7.07-7.09(4H, m), 7.20(2H, d, *J* = 8.2Hz), 7.29(1H, t, *J* = 8.2Hz), 7.44(2H, t, *J* = 8.2Hz), 8.03(2H, d, *J* = 8.2Hz); <sup>13</sup>C-NMR(100 MHz, CDCl<sub>3</sub>) 14.0, 37.8, 38.2, 66.6, 69.4, 70.7, 70.8, 78.7, 86.8, 121.5, 125.7, 125.9, 126.4, 127.3, 129.5, 129.6, 129.9, 131.1, 132.6, 133.1, 146.3, 146.7, 149.3, 150.7, 164.1, 169.4, 169.5, 170.9 IR (CHCl<sub>3</sub>) 3136, 1733, 1604, 1356, 1212, 1104, 851, 771 cm<sup>-1</sup>; MS (relative intensity) *m/z* 719 (M<sup>+</sup>, 91), 548 (10), 493(38), 400(11), 277(75), 267(24), 227(24), 201(17), 199(29), 170(25), 167(22); HRMS calcd for C<sub>42</sub>H<sub>37</sub>FeN<sub>3</sub>O<sub>5</sub>, 719.2083. found 719.2073

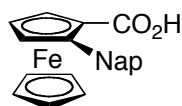

$[\alpha]_D^{30} = -101.3$  (*c* 0.31, CHCl<sub>3</sub>); <sup>1</sup>H-NMR(500 MHz, CDCl<sub>3</sub>)  $\delta$  4.38 (5H, s), 4.57 (1H, s), 4.62 (1H, t, *J* = 2.8Hz), 5.06 (1H, t, *J* = 2.8Hz), 7.30 (1H, t, *J* = 6.9Hz), 7.40 (1H, t, *J* = 6.9Hz), 7.52 (2H, d, *J* = 7.4Hz), 7.82 (2H, dd, *J* = 7.4, 3.2Hz), 8.09 (2H, d, *J* = 6.9Hz); <sup>13</sup>C-NMR(100 MHz, CDCl<sub>3</sub>) 70.2, 70.9, 71.3, 71.5, 76.9, 91.9, 124.9, 125.4, 125.6, 125.7, 127.7, 128.1, 129.3, 133.0, 133.3, 133.6, 177.1; IR (CHCl<sub>3</sub>) 3017, 2603, 1717, 1286, 1118, 905, 833 cm<sup>-1</sup>; MS (relative intensity) *m/z* 356 (M<sup>+</sup>, 16), 218 (16), 192 (28), 189 (17), 149 (34), 137 (18); HRMS calcd for C<sub>21</sub>H<sub>16</sub>FeO<sub>2</sub>, 356.0500. found 306.0499.

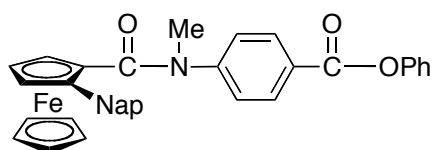

#### Ferrocenylamide **5a**

$[\alpha]_D^{28} = -31.9$  (*c* 0.27, CHCl<sub>3</sub>); <sup>1</sup>H-NMR (500 MHz, CDCl<sub>3</sub>)  $\delta$  3.21 (3H, s), 4.29 (5H, s), 4.48 (1H, t, *J* = 2.3Hz), 4.55 (1H, dd, *J* = 2.3, 1.4Hz), 4.92 (1H, dd, *J* = 2.3, 1.4Hz), 6.16 (2H, d, *J* = 8.7Hz), 7.12-7.28 (5H, m), 7.35 (1H, t, *J* = 8.2Hz), 7.42-7.47 (4H, m), 7.54 (1H, d, *J* = 8.7Hz), 7.76 (1H, t, *J* = 8.3Hz), 7.87 (1H, d, *J* = 6.8Hz); <sup>13</sup>C-NMR (100 MHz, CDCl<sub>3</sub>) 37.1, 67.8, 69.9, 71.4, 71.8, 84.8, 86.1, 121.5, 124.5, 124.7, 125.0, 125.2, 125.5, 125.8, 127.3, 128.0, 129.0, 129.4, 129.5, 131.7, 133.5, 134.2, 147.9, 150.8, 163.9, 169.9; IR (CHCl<sub>3</sub>) 1731, 1600, 1351, 1270, 1079, 831, 750 cm<sup>-1</sup>; MS (relative intensity) *m/z* 565 (M<sup>+</sup>, 2), 386 (2), 368 (5), 341 (4), 279 (8), 257 (7), 236 (10), 229 (7), 167 (23); HRMS calcd for C<sub>35</sub>H<sub>27</sub>FeNO<sub>3</sub>, 565.1340. found 565.1340

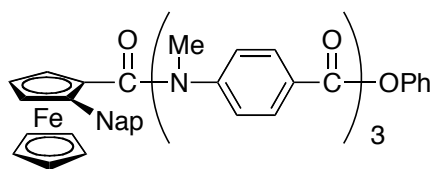

#### Ferrocenylamide **5b**

$[\alpha]_D^{28} = -30.7$  (*c* 0.5, CHCl<sub>3</sub>); <sup>1</sup>H-NMR (500 MHz, CDCl<sub>3</sub>)  $\delta$  2.99 (3H, s), 3.35 (3H, s), 3.51 (3H, s), 4.28 (5H, s), 4.30 (1H, t, *J* = 2.3Hz), 4.48 (1H, s), 4.52 (1H, s), 5.99 (2H, d, *J* = 7.3Hz), 6.56 (2H, d, *J* = 8.3Hz), 6.77 (2H, d, *J* = 8.3Hz), 7.08 (2H, d, *J* = 8.2Hz), 7.17-7.20 (4H, m), 7.29 (2H, t, *J* = 7.3Hz), 7.39-7.46 (4H, m), 7.67 (1H, d, *J* = 8.2Hz), 7.72 (1H, d, *J* = 8.2Hz), 7.78 (1H, d, *J* = 8.3Hz), 7.87 (1H, d, *J* = 8.3Hz), 8.03 (2H, d, *J* = 7.3Hz); <sup>13</sup>C-NMR (100 MHz, CDCl<sub>3</sub>) 37.2, 38.2, 67.2, 69.6, 71.1, 71.3, 71.4, 86.1, 86.4, 121.5, 124.8, 125.0, 125.2, 125.3, 125.5, 125.7, 126.0, 126.3, 127.2, 127.2, 128.0, 128.9, 129.4, 129.5, 129.8, 131.1, 131.9, 132.1, 132.7, 133.3, 133.9, 145.1, 146.4, 149.3, 150.7, 164.0, 169.1, 169.3, 169.5; IR (CHCl<sub>3</sub>) 3148, 2830, 1602, 1353, 1110, 853, 695cm<sup>-1</sup>; MS (relative intensity) *m/z* 781 (M<sup>+</sup>, 100), 648 (48), 548 (16), 493 (29), 368 (37), 353 (11), 313 (11), 289 (47), 267 (20), 260 (55), 218 (28), 213 (18); HRMS calcd for C<sub>47</sub>H<sub>39</sub>FeN<sub>3</sub>O<sub>5</sub>, 831.2396. found 831.2401

### CD and UV of 3a, 3b and 3d in CH<sub>3</sub>CN solution

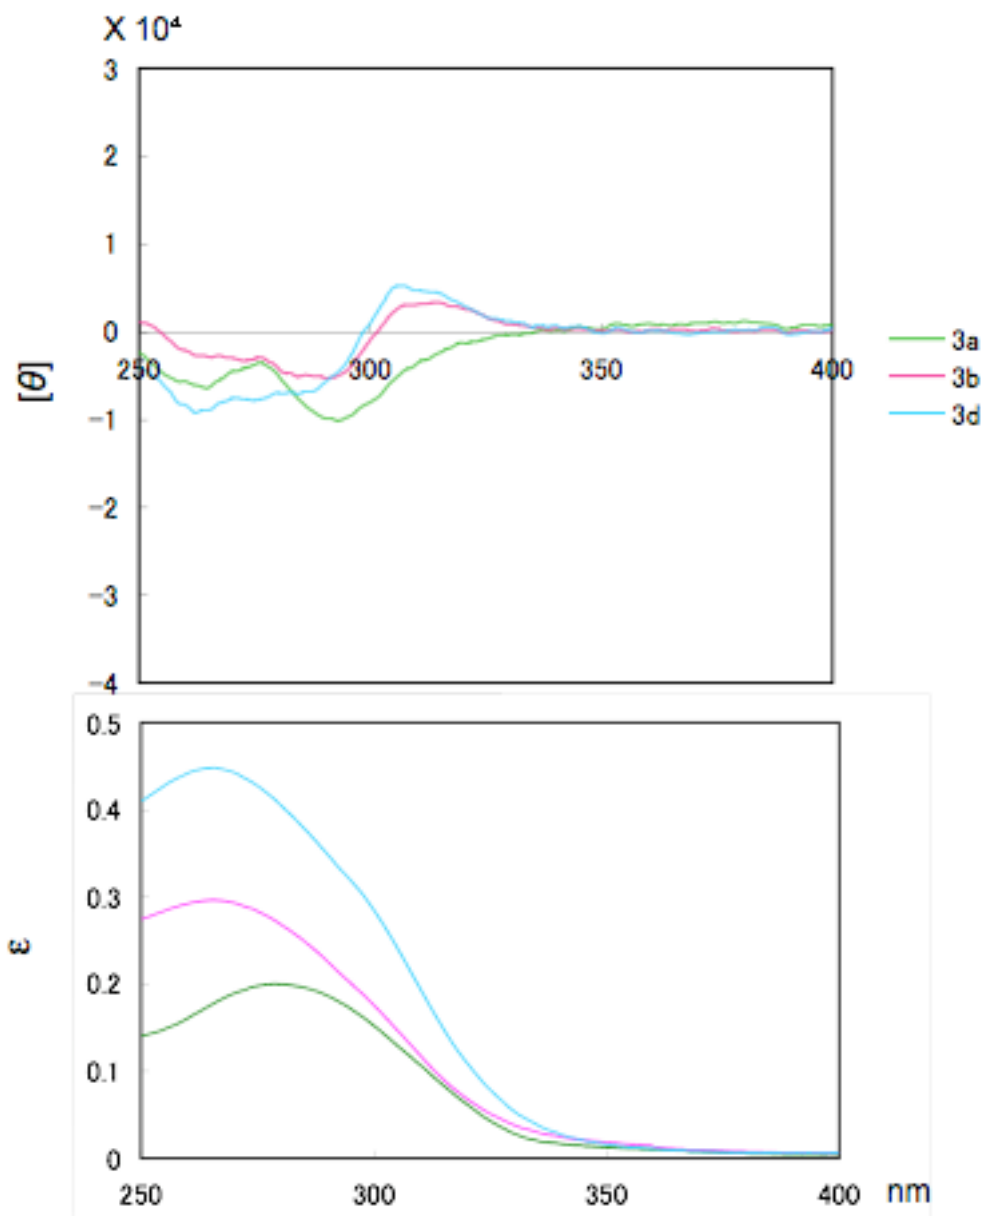

### Computational work and Cartesian coordinate

Geometry optimization calculations were carried out for estimating **3d** structure by Gaussian 98 program<sup>3</sup>. RHF level of theory in conjunction with 3-21(d) basis sets has been used. Total energy difference between two structures which were right-hand helical structure (**3d-I**) and not helical structure (**3d-II**) was compared.

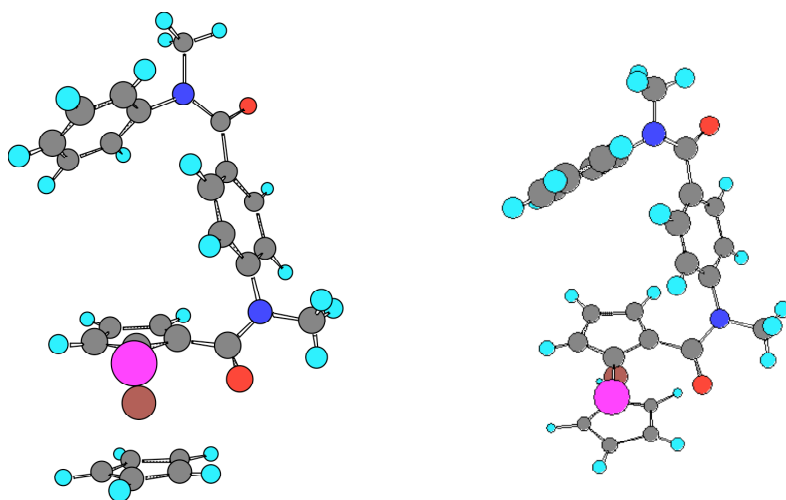

Molecular structure of **3d-I** -9393.7652087H

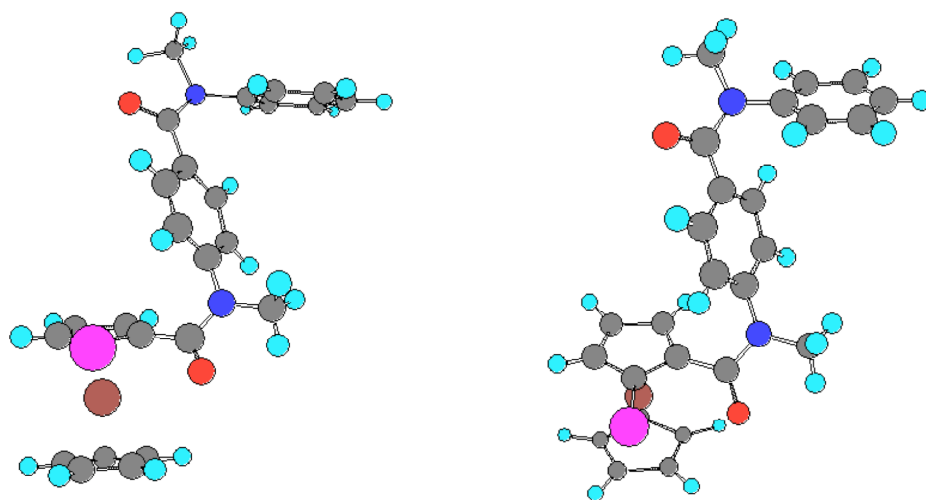

Molecular structure of **3d-II** -9393.757785H



Cartesian coordinate for **3d-I**

|    |                 |                 |                 |
|----|-----------------|-----------------|-----------------|
| C  | 0.000000000000  | 0.000000000000  | 0.000000000000  |
| C  | 0.000000000000  | 0.000000000000  | 1.408077646737  |
| C  | 1.362814262795  | 0.000000000000  | -0.436749785148 |
| H  | -0.858706698087 | 0.070780737657  | -0.628627821268 |
| Fe | 0.991181438547  | -1.909938820804 | 0.689790925059  |
| C  | 1.349146449730  | -0.033442028144 | 1.857067676070  |
| C  | 2.183466352105  | 0.000176380133  | 0.705678555952  |
| H  | -0.864753068793 | 0.039630174089  | 2.032954667065  |
| H  | 1.696610376758  | 0.052368248156  | -1.448127457758 |
| C  | 0.370090801336  | -3.859402693610 | -0.300445920743 |
| C  | -0.077521531001 | -3.894270390773 | 1.056534156603  |
| C  | 1.046855112066  | -3.851928540271 | 1.887026145684  |
| C  | 2.207845423282  | -3.756590349130 | 1.070226651439  |
| C  | 1.772056240656  | -3.786169860386 | -0.285676200956 |
| H  | 1.675589831927  | 0.027617351644  | 2.870003584340  |
| H  | 3.250255160099  | -0.009729907870 | 0.708339161740  |
| C  | 3.600872143057  | -3.583223557549 | 1.512392586003  |
| I  | 2.968556030213  | -3.838128067797 | -2.018638893870 |
| H  | -0.239453296752 | -3.956546663104 | -1.168451098149 |
| H  | -1.090725510994 | -3.994100417150 | 1.374024966469  |
| H  | 1.046694008394  | -3.896422551762 | 2.951768373567  |
| O  | 4.347817909650  | -2.784872034892 | 0.960151445101  |
| N  | 4.014153381822  | -4.308780948823 | 2.597850065994  |
| C  | 5.369225315007  | -4.048780035576 | 3.125421514157  |
| C  | 3.380811613711  | -5.505649825596 | 3.047366718481  |
| C  | 3.209038370542  | -6.580733184047 | 2.192091643078  |
| C  | 2.989205912127  | -5.622335829162 | 4.372133709373  |
| H  | 5.673533510195  | -3.064554458826 | 2.813648735995  |
| H  | 6.071239956661  | -4.776601126552 | 2.736420971211  |
| H  | 5.354209616794  | -4.112111536881 | 4.203441223352  |
| C  | 2.621219422596  | -7.747391970773 | 2.642584158441  |

|   |                 |                  |                 |
|---|-----------------|------------------|-----------------|
| C | 2.425013761121  | -6.795169506369  | 4.825997417149  |
| H | 3.530537775074  | -6.501743955913  | 1.174177261126  |
| H | 3.130409331304  | -4.796576591329  | 5.039639217895  |
| C | 2.214999751594  | -7.860561273073  | 3.962375500037  |
| H | 2.496168699016  | -8.561937923538  | 1.964433048668  |
| H | 2.144029424787  | -6.906287229732  | 5.852005949559  |
| C | 1.650937602949  | -9.100681699860  | 4.584416078768  |
| O | 1.743630350063  | -9.264383023223  | 5.791978306326  |
| N | 1.064262167180  | -10.059232972444 | 3.795094782398  |
| C | 0.676323990941  | -11.316102808637 | 4.470499966224  |
| C | 0.419451142309  | -9.798437454155  | 2.545915478151  |
| C | 0.752076630560  | -10.556153738485 | 1.433191197369  |
| C | -0.564776975417 | -8.830363799826  | 2.442299908993  |
| H | 1.401931906764  | -11.543387806735 | 5.233118405943  |
| H | -0.297892632308 | -11.217137686909 | 4.935003952847  |
| H | 0.642864168290  | -12.108880076368 | 3.738979600148  |
| C | -1.194787722422 | -8.605726228404  | 1.230581883816  |
| C | 0.112599012385  | -10.340158609246 | 0.227120197034  |
| H | 1.517356334687  | -11.301350966087 | 1.517897331930  |
| H | -0.827587756496 | -8.251736557225  | 3.304244971795  |
| C | -0.860319734070 | -9.360117463602  | 0.121032069633  |
| H | -1.947660827501 | -7.846784249966  | 1.157305256990  |
| H | 0.378399981917  | -10.928015948122 | -0.628664772827 |
| H | -1.350587236295 | -9.187465971932  | -0.815851164013 |

Cartesian coordinate for **3d-II**

|    |                 |                 |                 |
|----|-----------------|-----------------|-----------------|
| C  | 0.000000000000  | 0.000000000000  | 0.000000000000  |
| C  | 0.000000000000  | 0.000000000000  | 1.417281220180  |
| C  | 1.349107361667  | 0.000000000000  | -0.437787014257 |
| H  | -0.862064651947 | 0.045000438883  | -0.625910771284 |
| Fe | 0.988004632720  | -1.835449170056 | 0.709201267671  |
| C  | 1.350346136900  | -0.000911863205 | 1.853472905613  |
| C  | 2.182670451931  | 0.001838530649  | 0.707664373642  |
| H  | -0.861985199463 | 0.046977815868  | 2.043215358470  |
| H  | 1.679659598077  | 0.034261224921  | -1.450745385772 |
| C  | 0.593707850505  | -3.697179916798 | -0.412406860193 |
| C  | -0.164847942632 | -3.728415155329 | 0.782334616501  |
| C  | 0.730430423038  | -3.697773830389 | 1.872267168254  |
| C  | 2.047172762228  | -3.639251597744 | 1.360044904083  |
| C  | 1.960976475271  | -3.630759835568 | -0.060003596180 |
| H  | 1.683021455471  | 0.035069596669  | 2.865689909267  |
| H  | 3.248069266066  | 0.003086531846  | 0.711204708753  |
| C  | 3.296244174570  | -3.510677683003 | 2.135616457550  |
| I  | 3.545095931108  | -3.696003516240 | -1.442555916379 |
| H  | 0.212145297250  | -3.763886051133 | -1.404376382395 |
| H  | -1.225652568034 | -3.809647499292 | 0.845261807839  |
| H  | 0.471276898394  | -3.756319961475 | 2.903526837876  |
| O  | 4.125713643003  | -2.652442313416 | 1.867757995177  |
| N  | 3.465065811241  | -4.368312824008 | 3.187237891558  |
| C  | 4.664734968784  | -4.203444521624 | 4.032472329099  |
| C  | 2.729102205243  | -5.578359801284 | 3.359990781748  |
| C  | 2.704771471115  | -6.545589478490 | 2.368768140767  |
| C  | 2.065828541088  | -5.811788047468 | 4.554288479920  |
| H  | 5.078126922449  | -3.227619588170 | 3.845084673044  |
| H  | 5.402179499664  | -4.957658969533 | 3.785844063963  |
| H  | 4.393301743262  | -4.300243574578 | 5.073710624748  |
| C  | 2.011772096400  | -7.721176421141 | 2.569781206833  |
| C  | 1.397321254750  | -7.001552927716 | 4.764941319710  |

|   |                 |                  |                |
|---|-----------------|------------------|----------------|
| H | 3.210935933638  | -6.368764689383  | 1.442414065147 |
| H | 2.067767365080  | -5.056840457581  | 5.313971754125 |
| C | 1.374092928732  | -7.971147591548  | 3.775042040833 |
| H | 1.955215704689  | -8.458758408505  | 1.797134705058 |
| H | 0.890656723330  | -7.161203792121  | 5.691148785716 |
| C | 0.608164761244  | -9.253223620245  | 3.862575812395 |
| O | 0.231586060969  | -9.806647567244  | 2.841408670403 |
| N | 0.305044355936  | -9.779960386348  | 5.096444844981 |
| C | -0.592468200987 | -10.955150491531 | 5.102360716806 |
| C | 1.112039854197  | -9.607616192739  | 6.264174712370 |
| C | 0.518388520197  | -9.215004445092  | 7.454335808919 |
| C | 2.470326915498  | -9.876009874167  | 6.236521555878 |
| H | -1.321887999901 | -10.843431655687 | 4.317881897461 |
| H | -0.032695086208 | -11.866991995327 | 4.929740704430 |
| H | -1.083069605955 | -11.014733105512 | 6.061808236012 |
| C | 3.231737811853  | -9.732727061826  | 7.383423506538 |
| C | 1.277447198463  | -9.084850528168  | 8.602071086257 |
| H | -0.532504514917 | -9.006233414105  | 7.470288298630 |
| H | 2.927269387678  | -10.189767776152 | 5.320183012240 |
| C | 2.638463469853  | -9.339593241448  | 8.569137192406 |
| H | 4.283278723982  | -9.936805202262  | 7.350132024939 |
| H | 0.809947956609  | -8.780139963080  | 9.517146033656 |
| H | 3.227699561277  | -9.235029487868  | 9.457955248518 |

## References

1. Riant, O. Samuel, T. Flessner, S. Taudien, H. B. Kagan, *J. Org. Chem.* 1997, **62**, 6733.
2. A. Tanatani, A. Yokoyama, I. Azuma, Y. Takakura, C. Mitsui, M. Shiro, M. Uchiyama, A. Muranaka, N. Kobayashi and T. Yokozawa, *J. Am. Chem. Soc.*, 2005, **127**, 8553
- 3 Gaussian 98, Revision A.11.3, M. J. Frisch, G. W. Trucks, H. B. Schlegel, G. E.

Scuseria, M. A. Robb, J. R. Cheeseman, V. G. Zakrzewski, J. A. Montgomery, Jr., R. E. Stratmann, J. C. Burant, S. Dapprich, J. M. Millam, A. D. Daniels, K. N. Kudin, M. C. Strain, O. Farkas, J. Tomasi, V. Barone, M. Cossi, R. Cammi, B. Mennucci, C. Pomelli, C. Adamo, S. Clifford, J. Ochterski, G. A. Petersson, P. Y. Ayala, Q. Cui, K. Morokuma, N. Rega, P. Salvador, J. J. Dannenberg, D. K. Malick, A. D. Rabuck, K. Raghavachari, J. B. Foresman, J. Cioslowski, J. V. Ortiz, A. G. Baboul, B. B. Stefanov, G. Liu, A. Liashenko, P. Piskorz, I. Komaromi, R. Gomperts, R. L. Martin, D. J. Fox, T. Keith, M. A. Al-Laham, C. Y. Peng, A. Nanayakkara, M. Challacombe, P. M. W. Gill, B. Johnson, W. Chen, M. W. Wong, J. L. Andres, C. Gonzalez, M. Head-Gordon, E. S. Replogle, and J. A. Pople,  
Gaussian, Inc., Pittsburgh PA, 2002.

C:\Documents and Settings\JBOL\ffxfjfgfbfv\kamikawa\yoshihara\amido helix\ferrocene\1H\ex06.a1s

DFILE C:\Documents and Settings\  
CONRT  
DATIM Fri Nov 11 14:51:05 2005  
ORNUC 1H  
EXMOD NON  
ORFQ 399.65 MHz  
ORSET 124.00 KHz  
ORFIN 10500.00 Hz  
POINT 32766  
FREQ 7992.01 Hz  
SCANS 6  
ACQTM 4.1001 sec  
PD 2.9010 sec  
PWL 5.80 usec  
IRNUC 1H  
CTEMP 19.2 c  
SLVNT CDCL3  
EXREF 0.00 ppm  
RF 0.12 Hz  
RGAIN 20

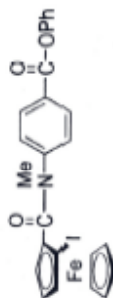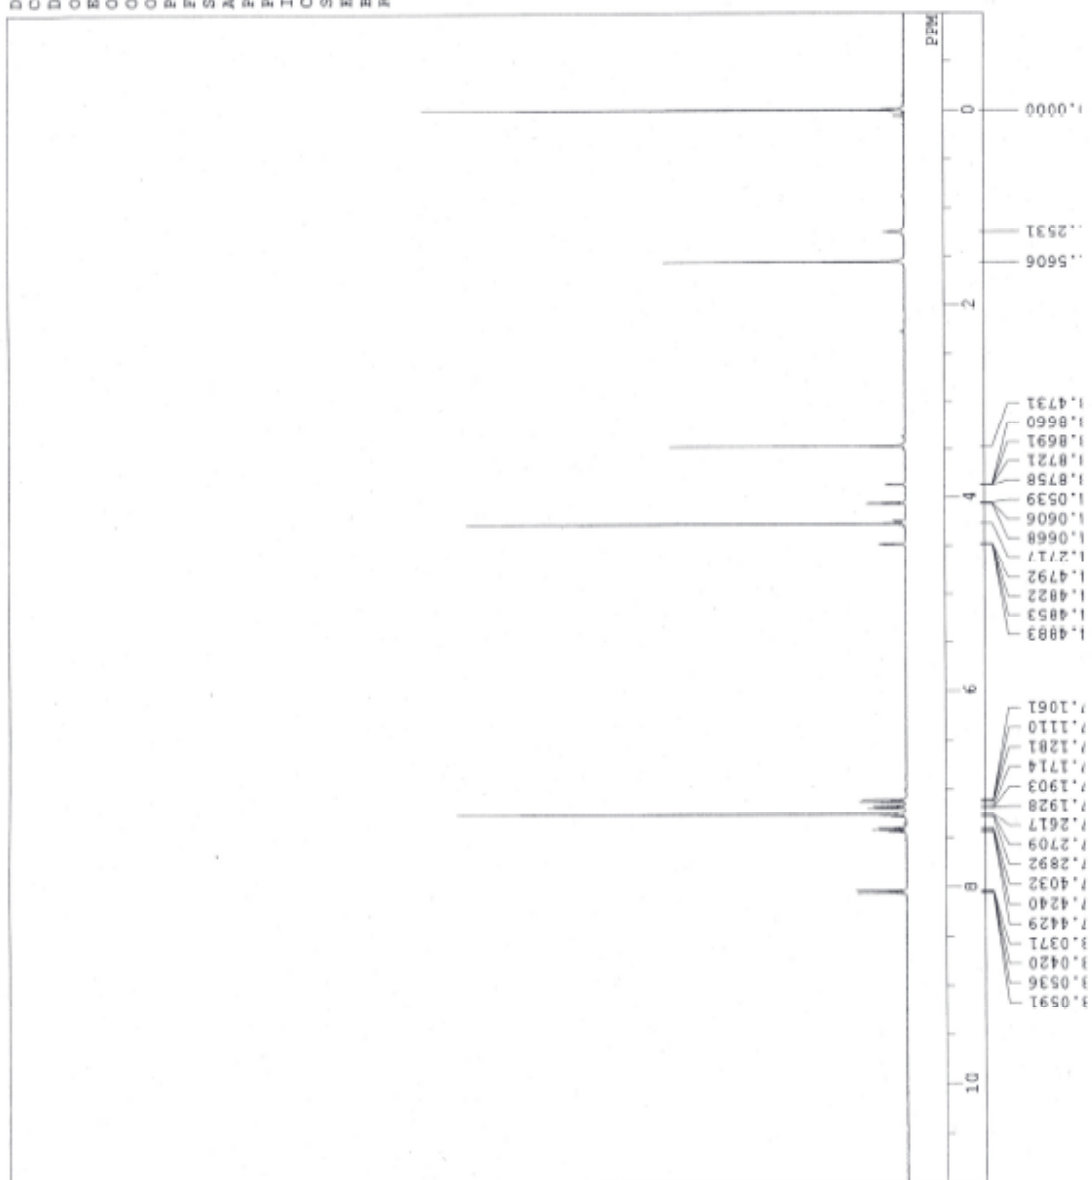







C:\Documents and Settings\JBOL\ff\FN\gfjfv\kamikawa\yoshibara\amido helix\ferrocene\1H\ex496.als

DEFILE C:\Documents and Settings  
 COMNT Thu Oct 20 16:35:40 2005  
 DATIM  
 ORNUC 1H  
 EXMOD NCH  
 OBFRQ 399.65 MHz  
 OSETE 124.00 KHz  
 ORFIN 10500.00 Hz  
 POINT 32768  
 FREQU 7992.01 Hz  
 SCANS 16  
 ACQTM 4.1001 sec  
 PD 2.9010 sec  
 PW1 5.80 usec  
 IRNUC 1H  
 CTEMP 20.0 C  
 SLVNT CDCL3  
 EXREF 0.00 PPM  
 BF 0.12 Hz  
 RGAIN 21

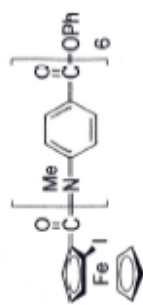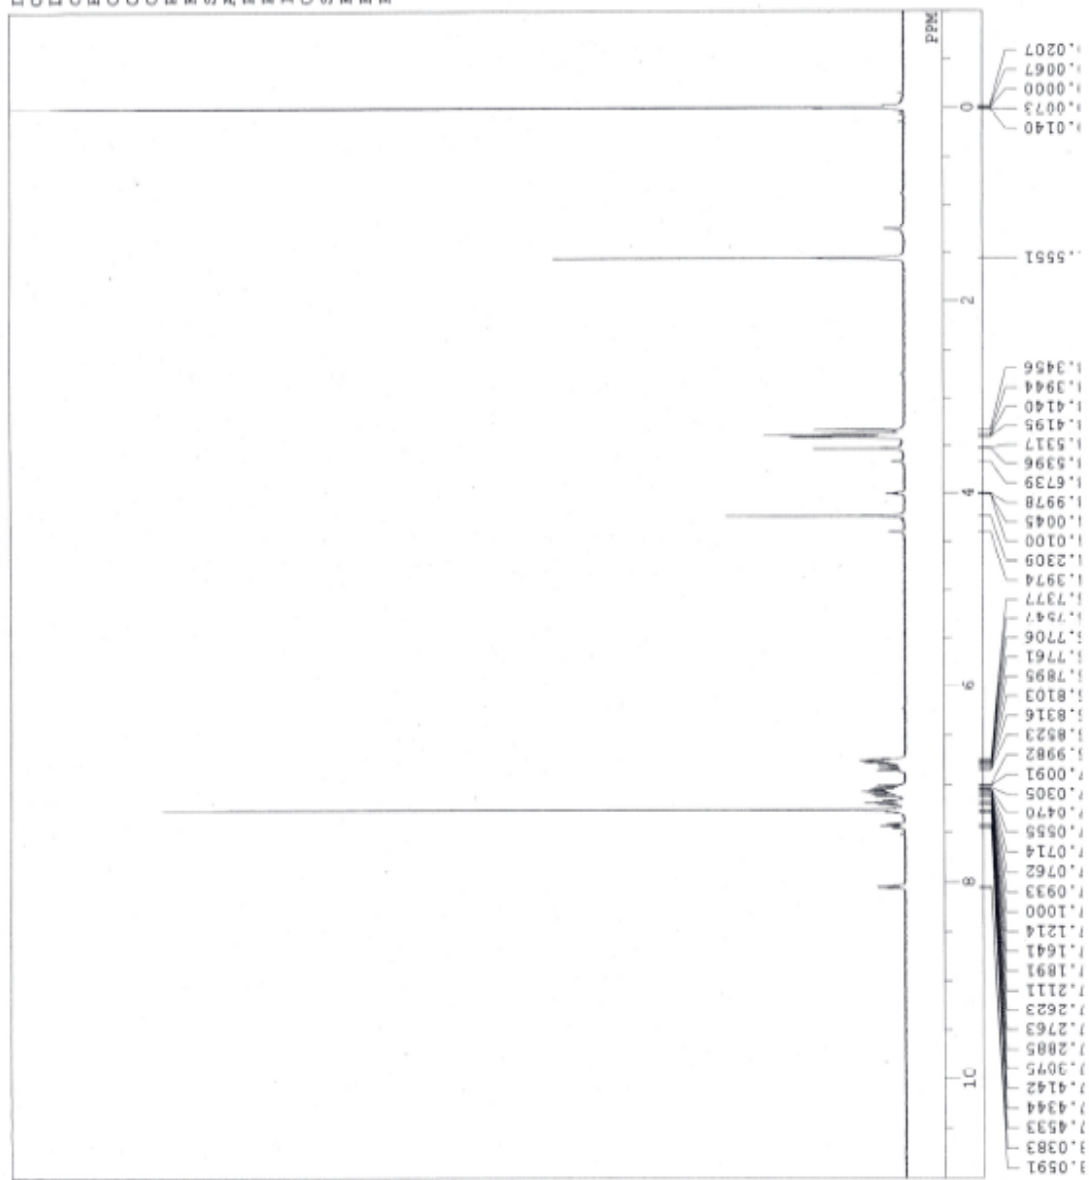

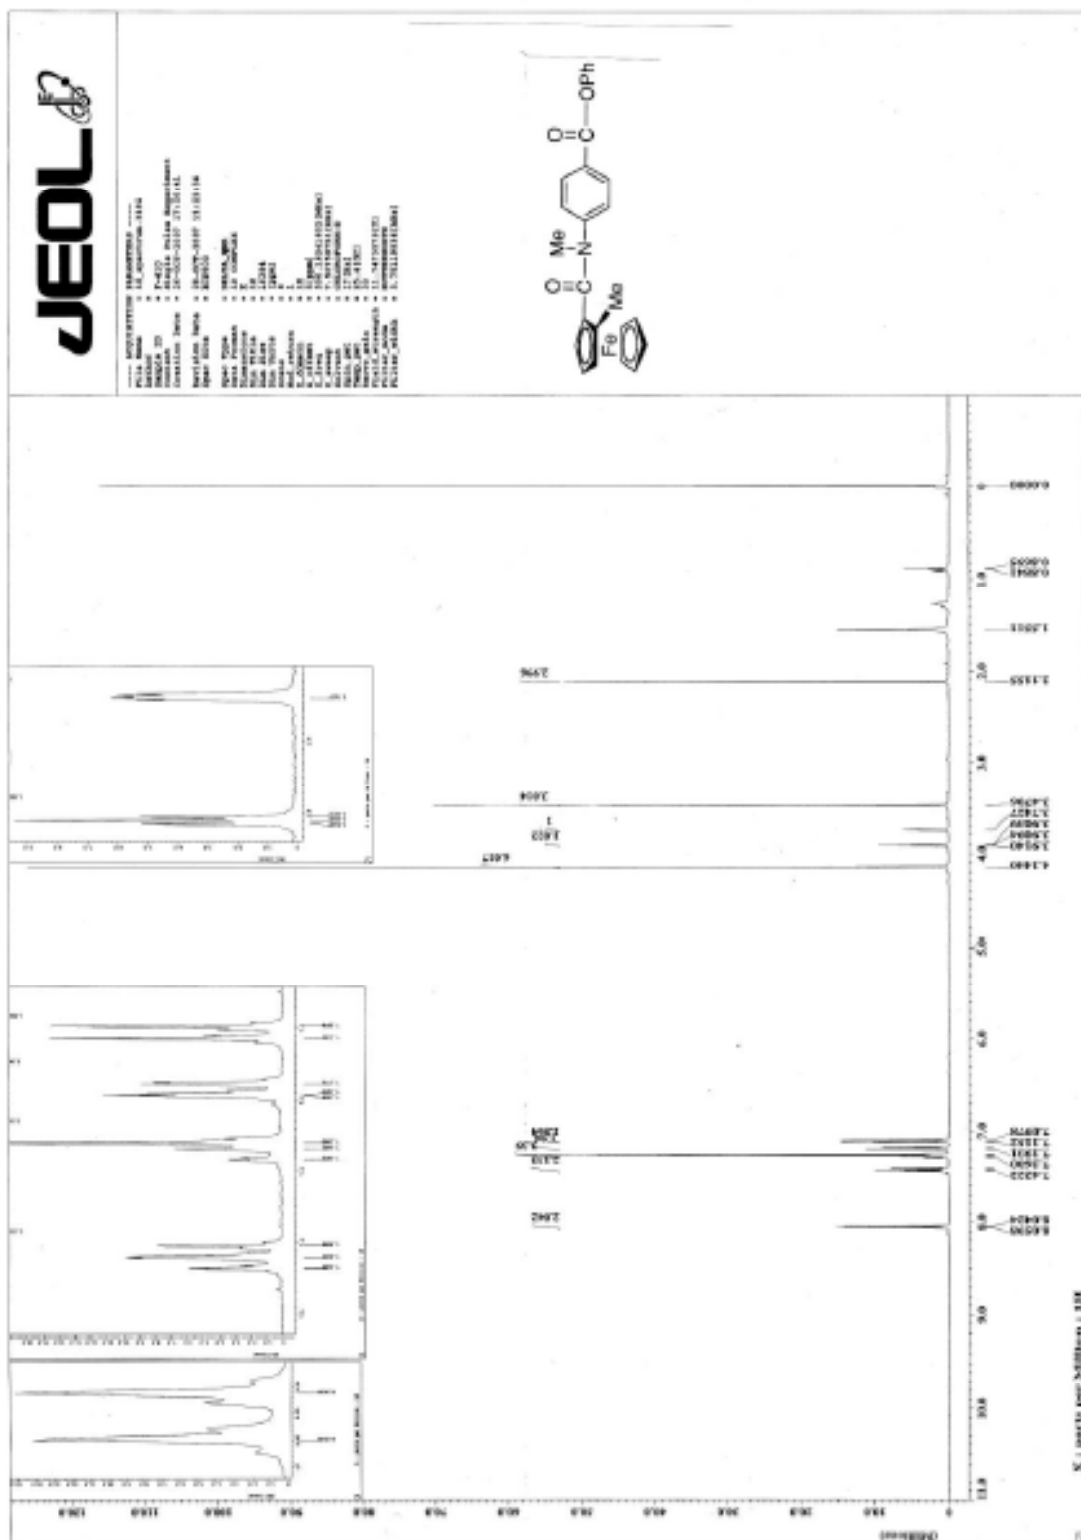

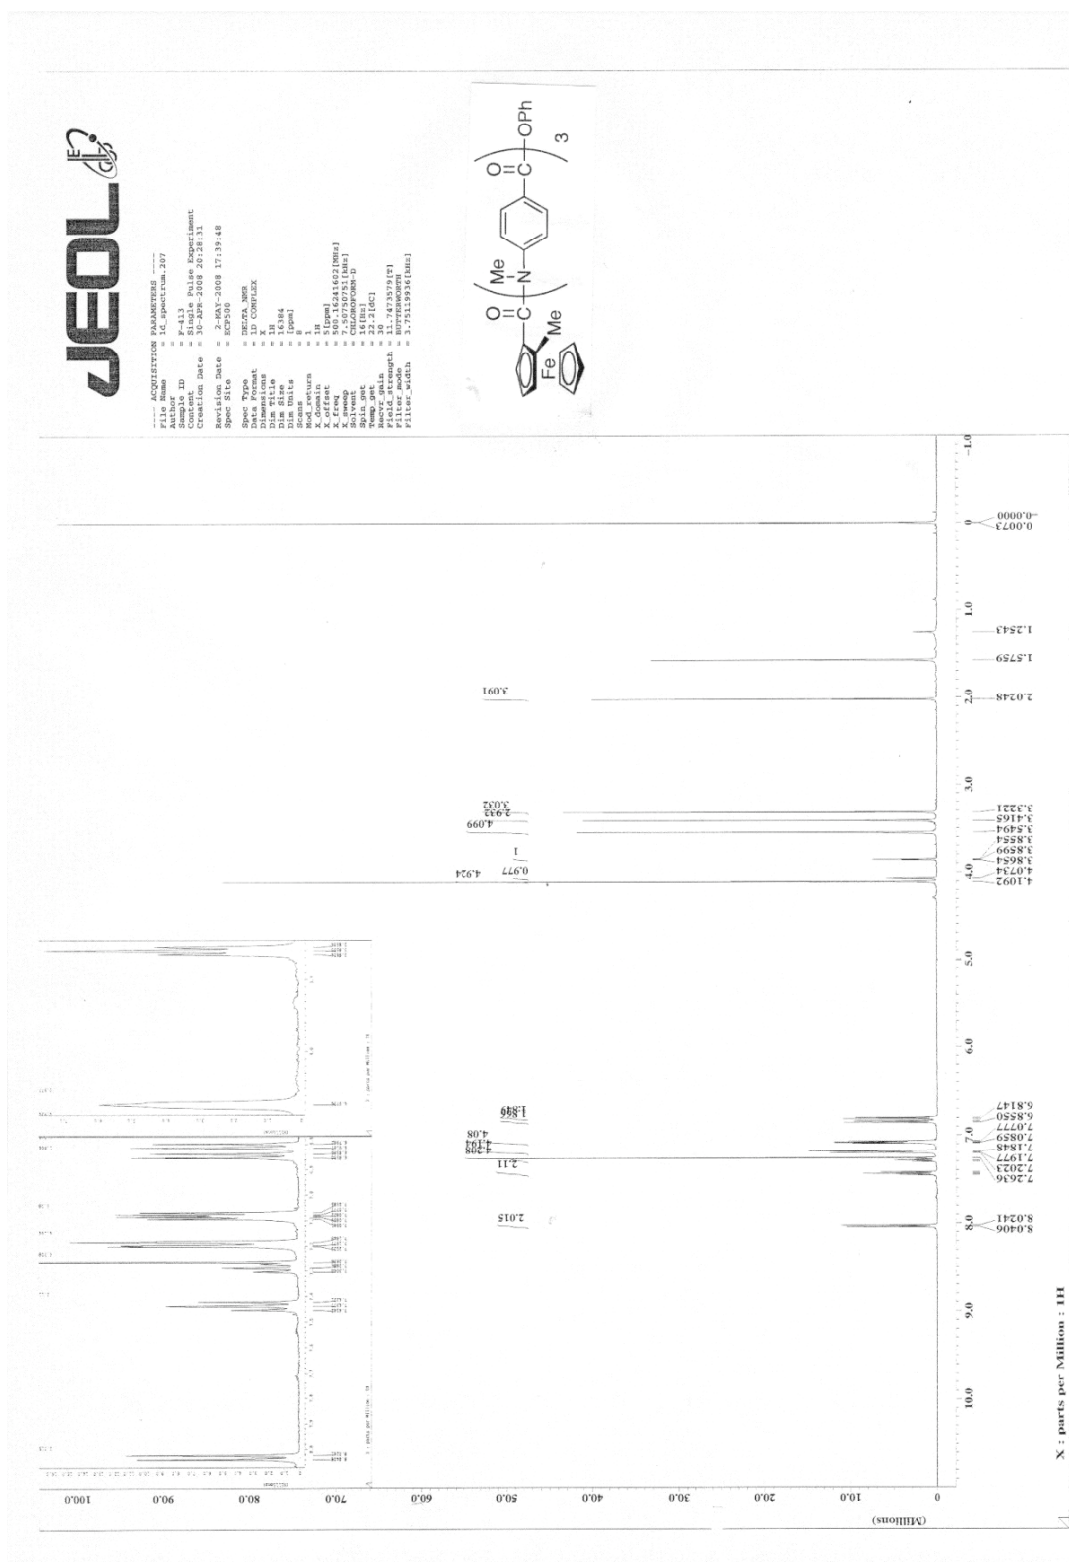



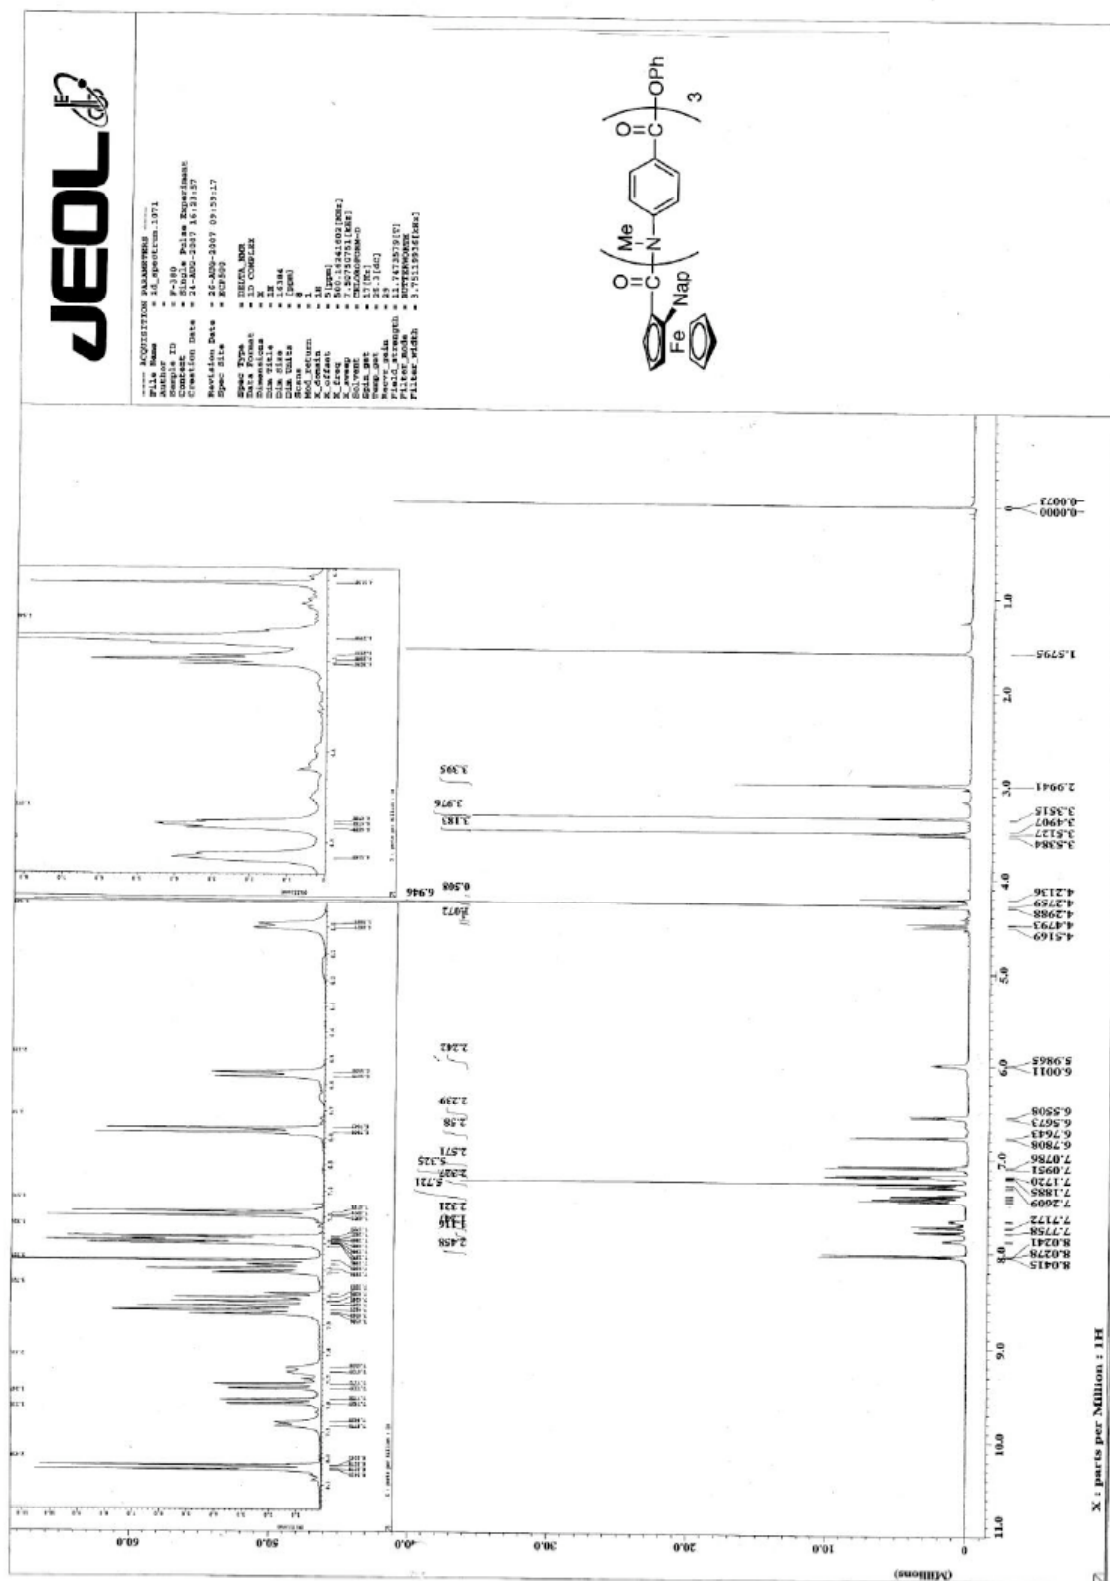

Supplement: b818123c.pdf [file b818123c.pdf]
